# Supplementary material
Source: PubMed Central journal article supplement (PMC7080140)
Supplement: 248_2019_1391_MOESM4_ESM.pdf [file 248_2019_1391_MOESM4_ESM.pdf]

**A. Statistical analysis of the association of host family and phylogenetic clustering performed on BaTS software. Parsimony Score (PS); Association Index (AI); Monophyletic Clade (MC). Values of  $p \leq 0.01$  were considered significant.**

| Statistic           | observed mean      | lower 95% CI       | upper 95% CU       | null mean          | lower 95% CI       | upper 95% CI       | significance         |
|---------------------|--------------------|--------------------|--------------------|--------------------|--------------------|--------------------|----------------------|
| AI                  | 1.5468833446502686 | 1.1476664543151855 | 1.8975307941436768 | 13.400958061218262 | 12.31212329864502  | 14.224847793579102 | 0.0                  |
| PS                  | 17.94845199584961  | 17.0               | 19.0               | 84.2565689086914   | 79.86600494384766  | 87.89895629882812  | 0.0                  |
| MC Miniopteridae    | 16.911205291748047 | 17.0               | 17.0               | 1.5972195863723755 | 1.0530472993850708 | 2.0393481254577637 | 0.009999990463256836 |
| MC Molossidae       | 19.204439163208008 | 14.0               | 20.0               | 2.1972031593322754 | 1.9166041612625122 | 2.9949002265930176 | 0.009999990463256836 |
| MC Vespertilionidae | 1.99875009059906   | 2.0                | 2.0                | 1.128929615020752  | 1.0                | 1.7994600534439087 | 0.009999990463256836 |
| MC Phyllostomidae   | 11.976301193237305 | 12.0               | 12.0               | 1.709789752960205  | 1.2552372217178345 | 2.0662965774536133 | 0.009999990463256836 |
| MC Rhinolophidae    | 8.965601921081543  | 9.0                | 9.0                | 1.674130916595459  | 1.1633418798446655 | 2.160141944885254  | 0.009999990463256836 |
| MC Mormoopidae      | 1.0                | 1.0                | 1.0                | 1.0                | 1.0                | 1.0                | 1.0                  |
| MC Hipposideridae   | 36.98834991455078  | 37.0               | 37.0               | 2.3783788681030273 | 2.0143492221832275 | 3.029148578643799  | 0.009999990463256836 |
| done                |                    |                    |                    |                    |                    |                    |                      |

**B. Statistical analysis of the association of location and phylogenetic clustering performed on BaTS software. Parsimony Score (PS); Association Index (AI); Monophyletic Clade (MC). Values of  $p \leq 0.01$  were considered significant.**

| Statistic             | observed mean      | lower 95% CI      | upper 95% CU       | null mean           | lower 95% CI       | upper 95% CI       | significance         |
|-----------------------|--------------------|-------------------|--------------------|---------------------|--------------------|--------------------|----------------------|
| AI                    | 3.477046012878418  | 3.098742961883545 | 3.8299124240875244 | 14.8568115234375    | 14.079565048217773 | 15.577279090881348 | 0.0                  |
| PS                    | 40.511775970458984 | 40.0              | 41.0               | 95.0477523803711    | 91.6084213256836   | 98.02189636230469  | 0.0                  |
| MC Hong_Kong          | 1.0                | 1.0               | 1.0                | 1.0044093132019043  | 1.0                | 1.0000499486923218 | 1.0                  |
| MC Barreiras_BA       | 1.0                | 1.0               | 1.0                | 1.0                 | 1.0                | 1.0                | 1.0                  |
| MC S.J.Rio Preto_SP   | 9.996749877929688  | 10.0              | 10.0               | 1.506858229637146   | 1.0762461423873901 | 2.0067496299743652 | 0.009999990463256836 |
| MC Bulgaria           | 5.785210609436035  | 5.0               | 6.0                | 1.5236754417419434  | 1.054847240447998  | 2.027798652648926  | 0.009999990463256836 |
| MC Panama             | 1.022648811340332  | 1.0               | 1.0                | 1.0005004405975342  | 1.0                | 1.0                | 1.0                  |
| MC Porto Alegre_RS    | 13.993450164794922 | 14.0              | 14.0               | 1.3411026000976562  | 1.0006999969482422 | 1.9989500045776367 | 0.009999990463256836 |
| MC CostaRica_Tirimina | 1.0                | 1.0               | 1.0                | 1.0                 | 1.0                | 1.0                | 1.0                  |
| MC CostaRica_SanJose  | 1.0                | 1.0               | 1.0                | 1.0                 | 1.0                | 1.0                | 1.0                  |
| MC Araçatuba          | 1.0                | 1.0               | 1.0                | 1.0                 | 1.0                | 1.0                | 1.0                  |
| MC Mexico             | 1.0                | 1.0               | 1.0                | 1.0                 | 1.0                | 1.0                | 1.0                  |
| MC China_Henan        | 1.0                | 1.0               | 1.0                | 1.0                 | 1.0                | 1.0                | 1.0                  |
| MC CostaRica_Parrita  | 1.0                | 1.0               | 1.0                | 1.0023518800735474  | 1.0                | 1.0016999244689941 | 1.0                  |
| MC Mojiang            | 2.999150037765503  | 3.0               | 3.0                | 1.233475923538208   | 1.0000499486923218 | 1.9931002855300903 | 0.009999990463256836 |
| MC Ghana              | 36.98830032348633  | 37.0              | 37.0               | 2.393120765686035   | 1.9682515859603882 | 3.0882456302642822 | 0.009999990463256836 |
| MC Fênix_PR           | 1.0                | 1.0               | 1.0                | 1.0045512914657593  | 1.0                | 1.0                | 1.0                  |
| MC Iguaçu_PR          | 1.0928953886032104 | 1.0               | 2.0                | 1.0243602991104126  | 1.0                | 1.054097294807434  | 1.0                  |
| MC Ivai_PR            | 1.9994499683380127 | 2.0               | 2.0                | 1.014824390411377   | 1.0                | 1.0483475923538208 | 0.009999990463256836 |
| MC Andradina_SP       | 1.0                | 1.0               | 1.0                | 1.00876000946426392 | 1.0                | 1.0                | 1.0                  |
| MC Penápolis_SP       | 1.9991999864578247 | 2.0               | 2.0                | 1.0149028301239014  | 1.0                | 1.0235488414764404 | 0.009999990463256836 |
| MC SudMennucci_SP     | 1.0                | 1.0               | 1.0                | 1.0                 | 1.0                | 1.0                | 1.0                  |
| MC Campinas_SP        | 1.8146092891693115 | 1.0               | 3.0                | 1.0536974668502808  | 1.0                | 1.3305834531784058 | 0.009999990463256836 |
| MC Ribeirão Preto_SP  | 1.0                | 1.0               | 1.0                | 1.0002559423446655  | 1.0                | 1.0                | 1.0                  |
| MC Valinhos_SP        | 1.0                | 1.0               | 1.0                | 1.0                 | 1.0                | 1.0                | 1.0                  |
| MC Sumaré_SP          | 1.0                | 1.0               | 1.0                | 1.0                 | 1.0                | 1.0                | 1.0                  |
| MC China_Guizhou      | 4.9982500076293945 | 5.0               | 5.0                | 1.0335619449615479  | 1.0                | 1.1610419750213623 | 0.009999990463256836 |
| MC China_Guangdong    | 3.3690314292907715 | 3.0               | 4.0                | 1.0429608821868896  | 1.0                | 1.1725913286209106 | 0.009999990463256836 |
| MC Hainan_China       | 1.0                | 1.0               | 1.0                | 1.0                 | 1.0                | 1.0                | 1.0                  |
| done                  |                    |                   |                    |                     |                    |                    |                      |

Done.
